# Supplementary material for: The role of a redox-active non-innocent ligand in additive-free C–C Glaser–Hay and Suzuki coupling reactions by an o-aminophenol palladium(ii) complex
Source: Royal Society of Chemistry journal article supplement (doi:10.1039/d2ra07252a), 2023-01-01
Supplement: d2ra07252a1.pdf [file d2ra07252a1.pdf]

## Supporting Information

### The Role of Redox Active Non-innocent Ligand in Additive free C-C Glaser-Hay and Suzuki Coupling Reactions by *o*-aminophenol palladium(II) complex

| Contents                                                                                          | page |
|---------------------------------------------------------------------------------------------------|------|
| IR spectrum of H <sub>2</sub> L <sup>NAP</sup>                                                    | S2   |
| IR spectrum of PdL <sub>2</sub> <sup>NIS</sup>                                                    | S2   |
| <sup>1</sup> H NMR spectrum of PdL <sub>2</sub> <sup>NIS</sup>                                    | S3   |
| Regions between 7.3- 7.8 ppm were assigned as aromatic regions in PdL <sub>2</sub> <sup>NIS</sup> | S3   |
| <sup>13</sup> C NMR spectrum of PdL <sub>2</sub> <sup>NIS</sup>                                   | S4   |
| Crystallographic data and structure refinement                                                    | S5   |
| Bond distances (Å) and bond angles (°)                                                            | S6   |
| <sup>1</sup> H NMR spectrum of (4-phenyl-1,3-butadiynyl)benzene                                   | S7   |
| <sup>1</sup> H NMR spectrum of 4-methyl-1-[4-(4-methylphenyl)buta-1,3-diyne]benzene               | S8   |
| <sup>1</sup> H NMR spectrum of 1,1'-(1,3-Butadiyne-1,4-diyl)bis(2-methoxybenzene)                 | S9   |
| <sup>1</sup> H NMR spectrum of 1,1'-(1,3- Butadiyne-1,4-diyl)bis(4-fluorobenzene)                 | S10  |
| <sup>1</sup> H NMR spectrum of Biphenyl                                                           | S11  |
| <sup>1</sup> H NMR spectrum of 4-Methylbiphenyl                                                   | S12  |
| <sup>1</sup> H NMR spectrum of 4-Nitrobiphenyl                                                    | S13  |
| <sup>1</sup> H NMR spectrum of 2,4-Dinitrobiphenyl                                                | S14  |
| <sup>1</sup> H NMR spectrum of 4-Biphenylcarbaldehyd                                              | S15  |

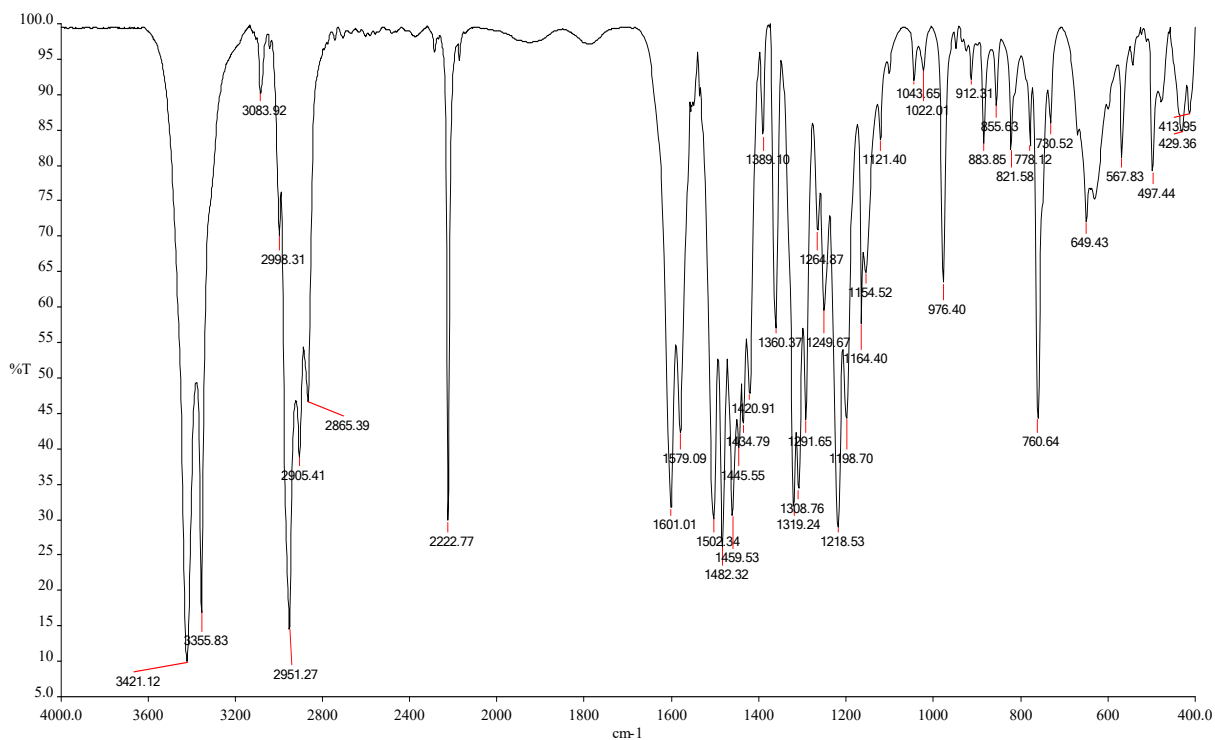

Figure S1. IR spectrum of  $H_2L^{NAP}$

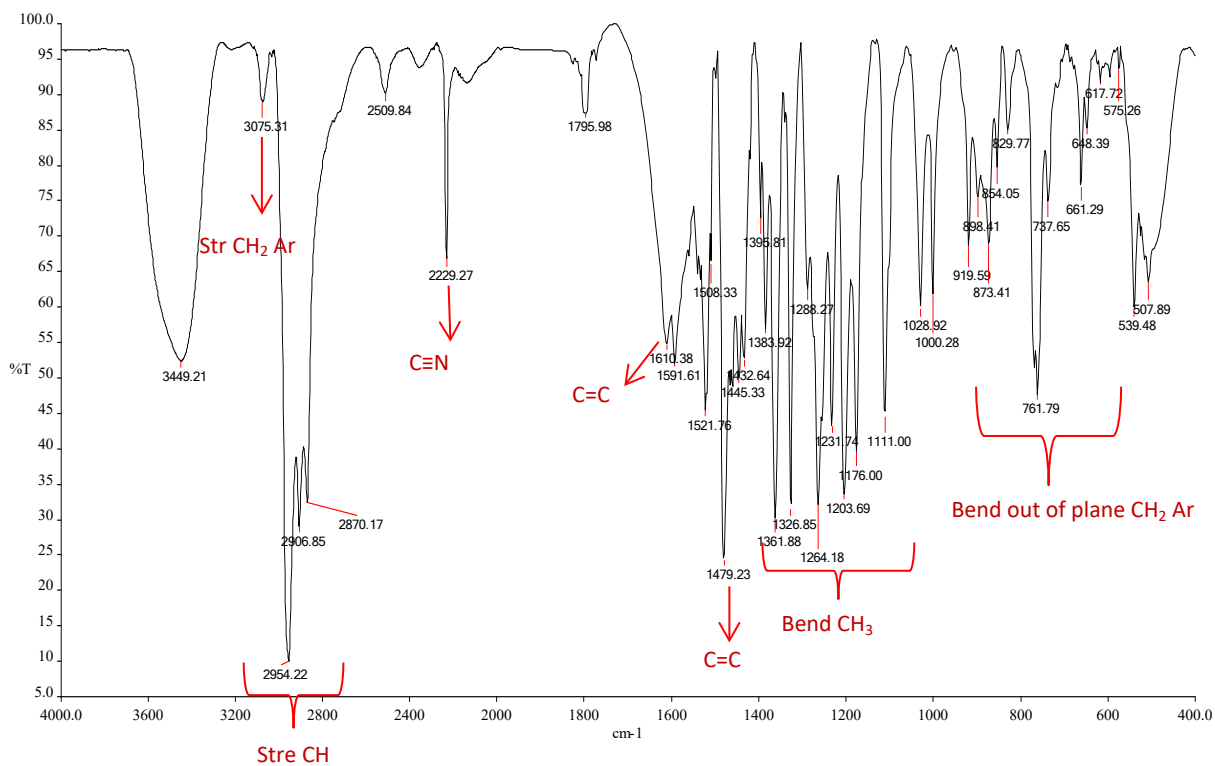

Figure S2. IR spectrum of  $PdL_2^{NIS}$

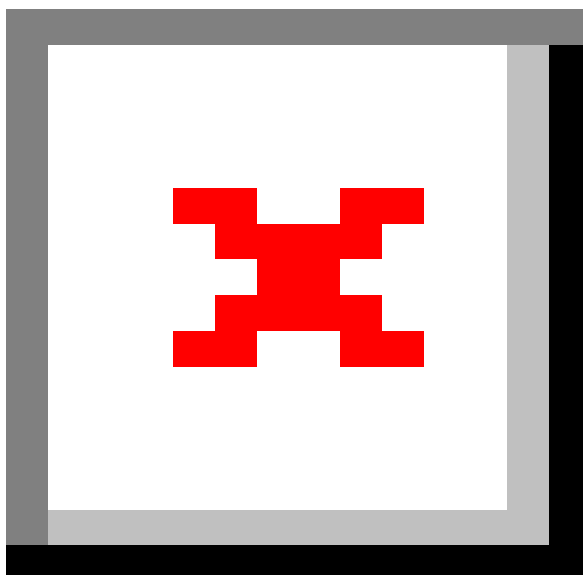

**Figure S3.**  $^1\text{H}$  NMR spectrum of  $\text{PdL}_2^{\text{NIS}}$  ( $\text{CDCl}_3$ , 700 MHz)

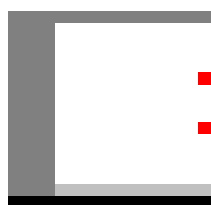

**Figure S4.** Regions between 7.3- 7.8 ppm were assigned as aromatic regions

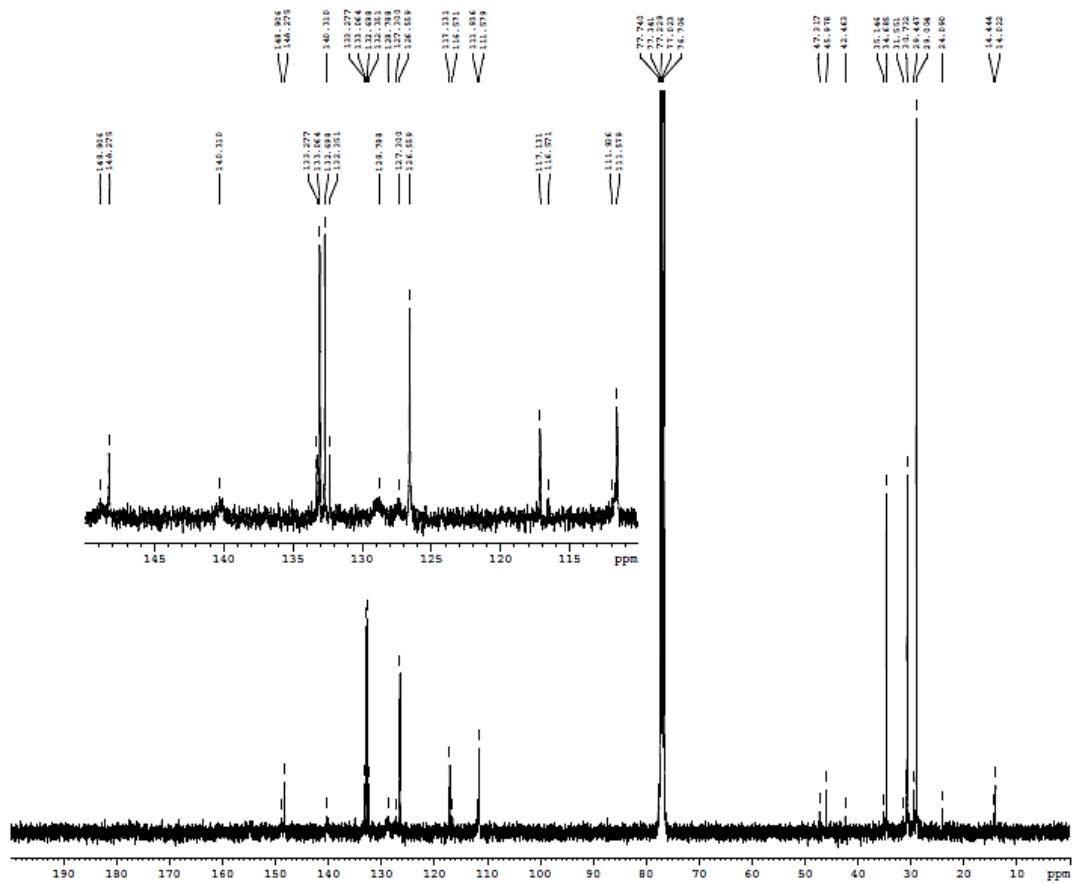

Figure S5.  $^{13}\text{C}$  NMR spectrum of  $\text{Pd}_2\text{NIS}$  ( $\text{CDCl}_3$ , 100 MHz)

|                                   |                                                                  |
|-----------------------------------|------------------------------------------------------------------|
| Identification code               | e1470a_a                                                         |
| Empirical formula                 | C <sub>42</sub> H <sub>48</sub> N <sub>4</sub> O <sub>2</sub> Pd |
| Formula weight                    | 747.24                                                           |
| Temperature                       | 293(2) K                                                         |
| Wavelength                        | 0.71073 Å                                                        |
| Crystal system                    | Monoclinic                                                       |
| Space group                       | P2 <sub>1</sub> /c                                               |
| Unit cell dimensions              | a = 16.674(2) Å                                                  |
|                                   | b = 8.0975(7) Å                                                  |
|                                   | c = 16.837(2) Å                                                  |
|                                   | α = 90°                                                          |
|                                   | β = 119.020(16)°                                                 |
|                                   | γ = 90°                                                          |
| Volume                            | 1987.8(5) Å <sup>3</sup>                                         |
| Z                                 | 2                                                                |
| Density (calculated)              | 1.248 Mg/m <sup>3</sup>                                          |
| Absorption coefficient            | 0.505 mm <sup>-1</sup>                                           |
| F(000)                            | 780                                                              |
| Crystal size                      | 0.605 x 0.456 x 0.177 mm <sup>3</sup>                            |
| Theta range for data collection   | 2.420 to 28.541°                                                 |
| Index ranges                      | -17<=h<=20, -6<=k<=10, -22<=l<=22                                |
| Reflections collected             | 8982                                                             |
| Independent reflections           | 4146 [R(int) = 0.0945]                                           |
| Completeness to theta = 25.000°   | 93.0 %                                                           |
| Refinement method                 | Full-matrix least-squares on F <sup>2</sup>                      |
| Data / restraints / parameters    | 4146 / 0 / 226                                                   |
| Goodness-of-fit on F <sup>2</sup> | 1.161                                                            |
| Final R indices [I>2sigma(I)]     | R1 = 0.0813, wR2 = 0.2229                                        |
| R indices (all data)              | R1 = 0.1242, wR2 = 0.2610                                        |
| Extinction coefficient            | n/a                                                              |
| Largest diff. peak and hole       | 0.917 and -0.687 e.Å <sup>-3</sup>                               |

| Table S2. Selected bond lengths [Å] and angles [°] for PdL <sub>2</sub> <sup>NIS</sup> |           |                     |          |
|----------------------------------------------------------------------------------------|-----------|---------------------|----------|
| Bonds                                                                                  |           | Angles              |          |
| Pd(1)-N(1)                                                                             | 1.963(6)  | N(1)#1-Pd(1)-N(1)   | 180.0(3) |
| Pd(1)-N(1)#1                                                                           | 1.963(6)  | N(1)#1-Pd(1)-O(1)#1 | 81.4(2)  |
| Pd(1)-O(1)                                                                             | 1.965(5)  | N(1)-Pd(1)-O(1)#1   | 98.6(2)  |
| Pd(1)-O(1)#1                                                                           | 1.965(5)  | N(1)#1-Pd(1)-O(1)   | 98.6(2)  |
| O(1)-C(1)                                                                              | 1.309(9)  | N(1)-Pd(1)-O(1)     | 81.4(2)  |
| C(1)-C(6)                                                                              | 1.424(10) | O(1)#1-Pd(1)-O(1)   | 180.0    |
| C(1)-C(2)                                                                              | 1.425(10) | C(1)-O(1)-Pd(1)     | 113.7(4) |
| C(2)-C(3)                                                                              | 1.371(11) | O(1)-C(1)-C(6)      | 117.9(6) |
| C(2)-C(13)                                                                             | 1.530(11) | O(1)-C(1)-C(2)      | 122.3(7) |
| C(3)-C(4)                                                                              | 1.434(11) | C(6)-C(1)-C(2)      | 119.7(7) |
| C(4)-C(5)                                                                              | 1.368(11) | C(3)-C(2)-C(1)      | 116.3(7) |
| C(4)-C(17)                                                                             | 1.521(12) | C(3)-C(2)-C(13)     | 121.4(7) |
| C(5)-C(6)                                                                              | 1.409(11) | C(1)-C(2)-C(13)     | 122.2(7) |
| C(6)-N(1)                                                                              | 1.369(10) | C(2)-C(3)-C(4)      | 125.1(7) |
| N(1)-C(7)                                                                              | 1.396(9)  | C(5)-C(4)-C(3)      | 117.7(7) |
| C(7)-C(8)                                                                              | 1.383(11) | C(5)-C(4)-C(17)     | 122.7(7) |
| C(8)-C(9)                                                                              | 1.392(13) | C(3)-C(4)-C(17)     | 119.5(7) |
| C(9)-C(10)                                                                             | 1.354(14) | C(4)-C(5)-C(6)      | 119.9(7) |
| C(10)-C(11)                                                                            | 1.361(14) | N(1)-C(6)-C(5)      | 126.3(7) |
| C(11)-C(12)                                                                            | 1.395(11) | N(1)-C(6)-C(1)      | 112.5(7) |
| C(12)-C(21)                                                                            | 1.438(12) | C(5)-C(6)-C(1)      | 121.2(7) |
| C(21)-N(2)                                                                             | 1.139(11) | C(6)-N(1)-C(7)      | 121.2(6) |
| C(13)-C(14)                                                                            | 1.520(13) | C(6)-N(1)-Pd(1)     | 114.4(5) |
| C(13)-C(15)                                                                            | 1.531(12) | C(7)-N(1)-Pd(1)     | 124.2(5) |
| C(13)-C(16)                                                                            | 1.541(12) | C(8)-C(7)-N(1)      | 122.4(7) |
| C(17)-C(18)                                                                            | 1.499(14) | C(8)-C(7)-C(12)     | 118.0(7) |
| C(17)-C(20)                                                                            | 1.518(16) | N(1)-C(7)-C(12)     | 119.3(6) |
| C(17)-C(19)                                                                            | 1.548(13) | C(7)-C(8)-C(9)      | 120.5(8) |
|                                                                                        |           | C(10)-C(9)-C(8)     | 120.1(8) |
|                                                                                        |           | C(9)-C(10)-C(11)    | 121.5(9) |
|                                                                                        |           | C(10)-C(11)-C(12)   | 119.1(8) |
|                                                                                        |           | C(11)-C(12)-C(7)    | 120.7(7) |
|                                                                                        |           | C(11)-C(12)-C(21)   | 120.1(7) |
|                                                                                        |           | C(7)-C(12)-C(21)    | 119.2(7) |
|                                                                                        |           | C(14)-C(13)-C(2)    | 108.9(7) |
|                                                                                        |           | C(14)-C(13)-C(15)   | 108.8(8) |
|                                                                                        |           | C(2)-C(13)-C(15)    | 112.2(7) |
|                                                                                        |           | C(14)-C(13)-C(16)   | 108.9(9) |
|                                                                                        |           | C(2)-C(13)-C(16)    | 109.7(7) |

| Table S2. Selected bond lengths [Å] and angles [°] for PdL <sub>2</sub> <sup>NIS</sup> (continued) |           |
|----------------------------------------------------------------------------------------------------|-----------|
| Angles                                                                                             |           |
| C(18)-C(17)-C(20)                                                                                  | 110.0(10) |
| C(18)-C(17)-C(4)                                                                                   | 113.6(8)  |
| C(20)-C(17)-C(4)                                                                                   | 107.5(9)  |
| C(18)-C(17)-C(19)                                                                                  | 105.8(9)  |
| C(20)-C(17)-C(19)                                                                                  | 110.4(10) |
| C(4)-C(17)-C(19)                                                                                   | 109.6(8)  |
| C(15)-C(13)-C(16)                                                                                  | 108.3(8)  |
| N(2)-C(21)-C(12)                                                                                   | 178.7(10) |

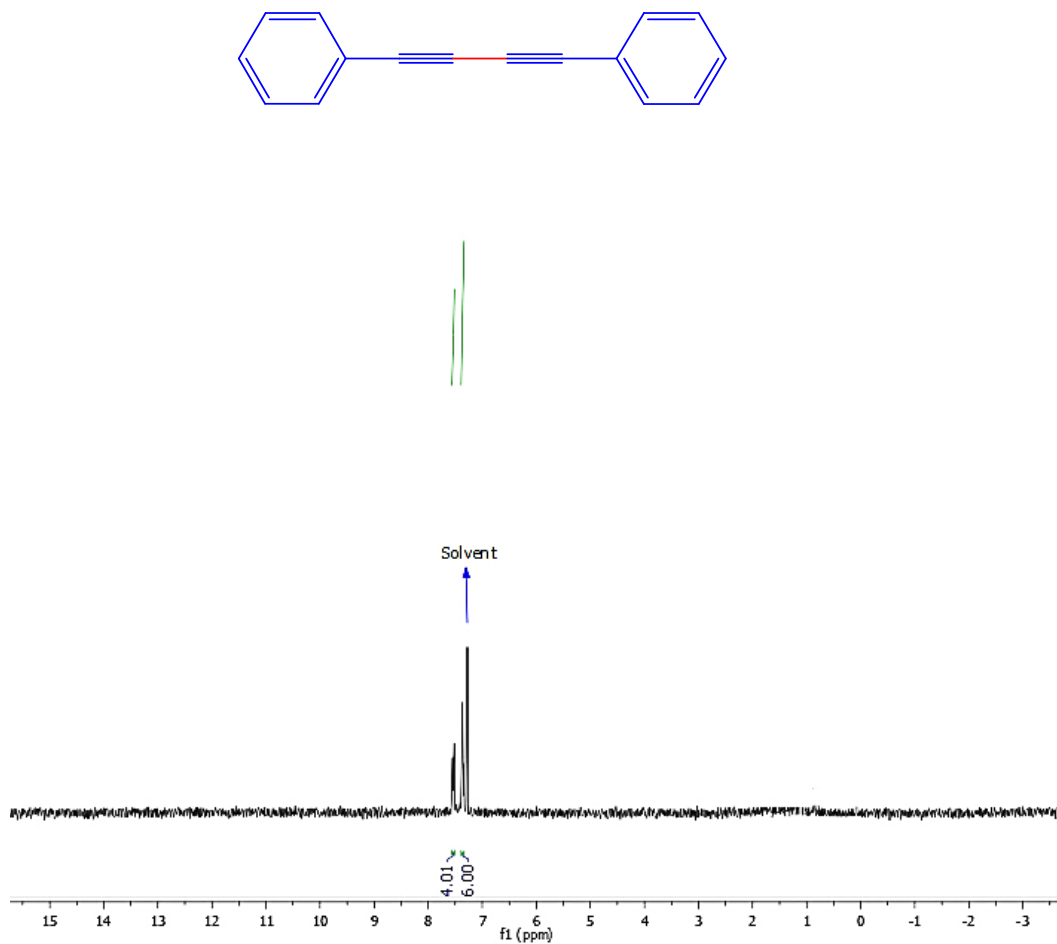

Figure S6. <sup>1</sup>H NMR spectrum of (4-phenyl-1,3-butadiynyl)benzene(CDCl<sub>3</sub>, 250 MHz)

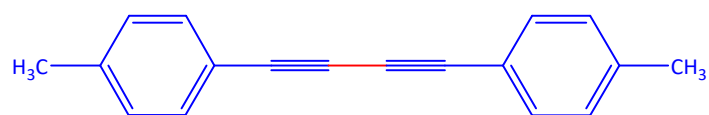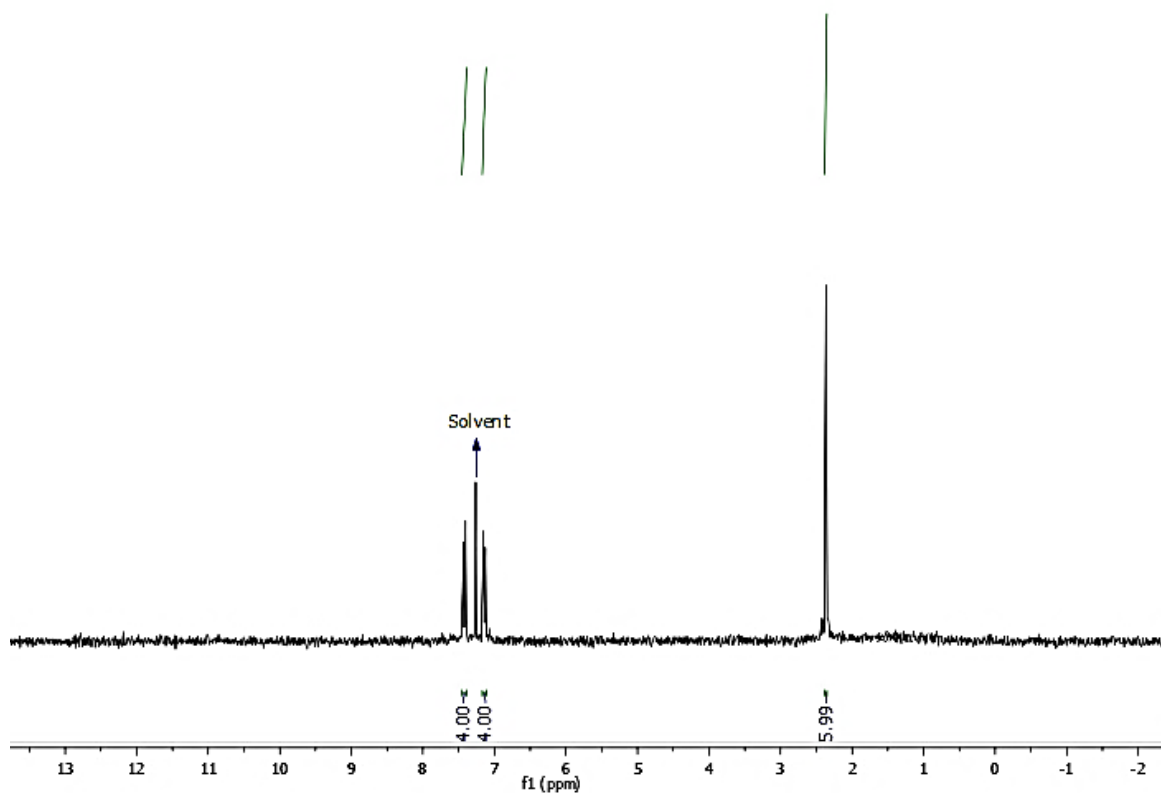

Figure S7.  $^1\text{H}$  NMR spectrum of 4-methyl-1-[4-(4-methylphenyl)buta-1,3-dienyl]benzene( $\text{CDCl}_3$ , 250 MHz)



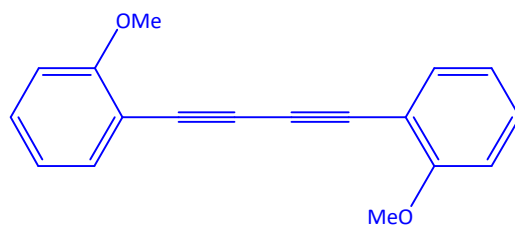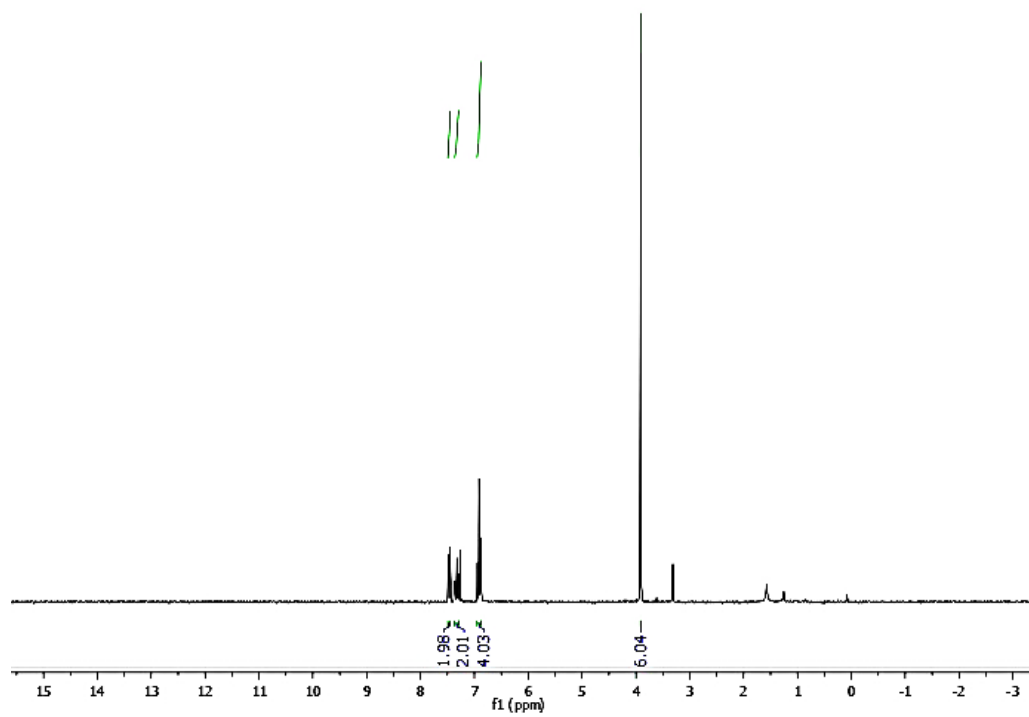

**Figure S8.** <sup>1</sup>H NMR spectrum of 1,1'-(1,3-Butadiyne-1,4-diyl)bis(2-methoxybenzene) (CDCl<sub>3</sub>, 250 MHz)

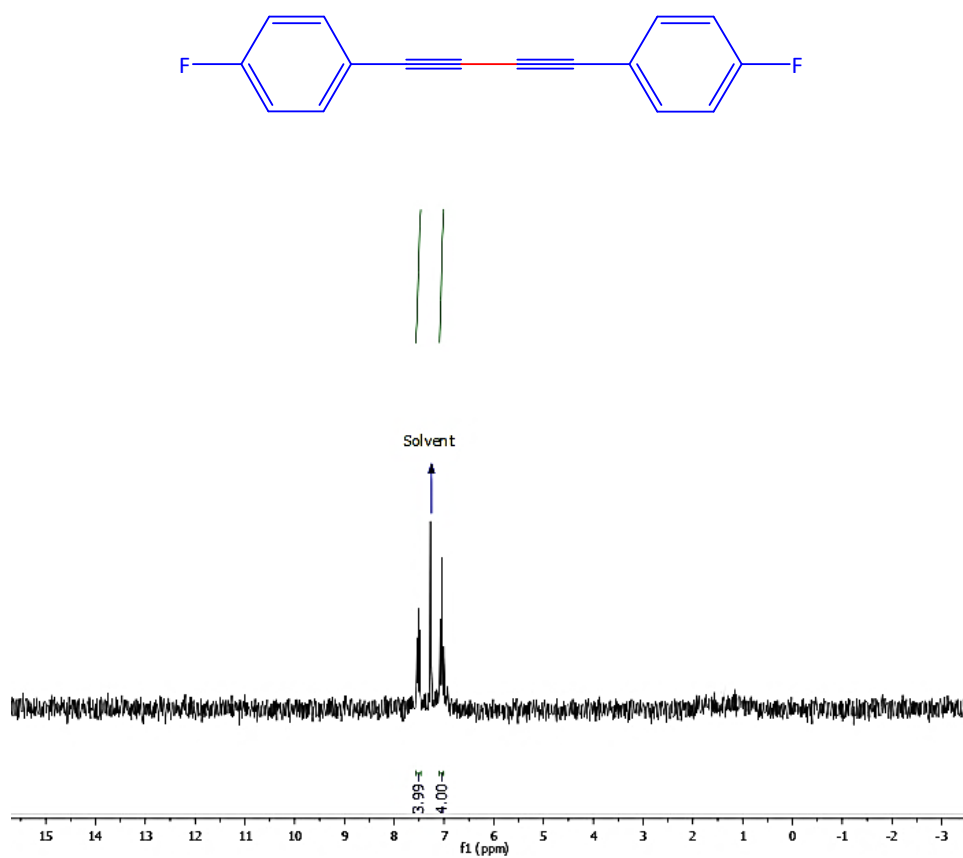

**Figure S9.** <sup>1</sup>H NMR spectrum of 1,1'-(1,3-Butadiyne-1,4-diyl)bis(4-fluorobenzene) (CDCl<sub>3</sub>, 250 MHz)

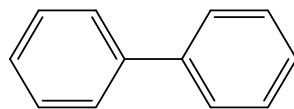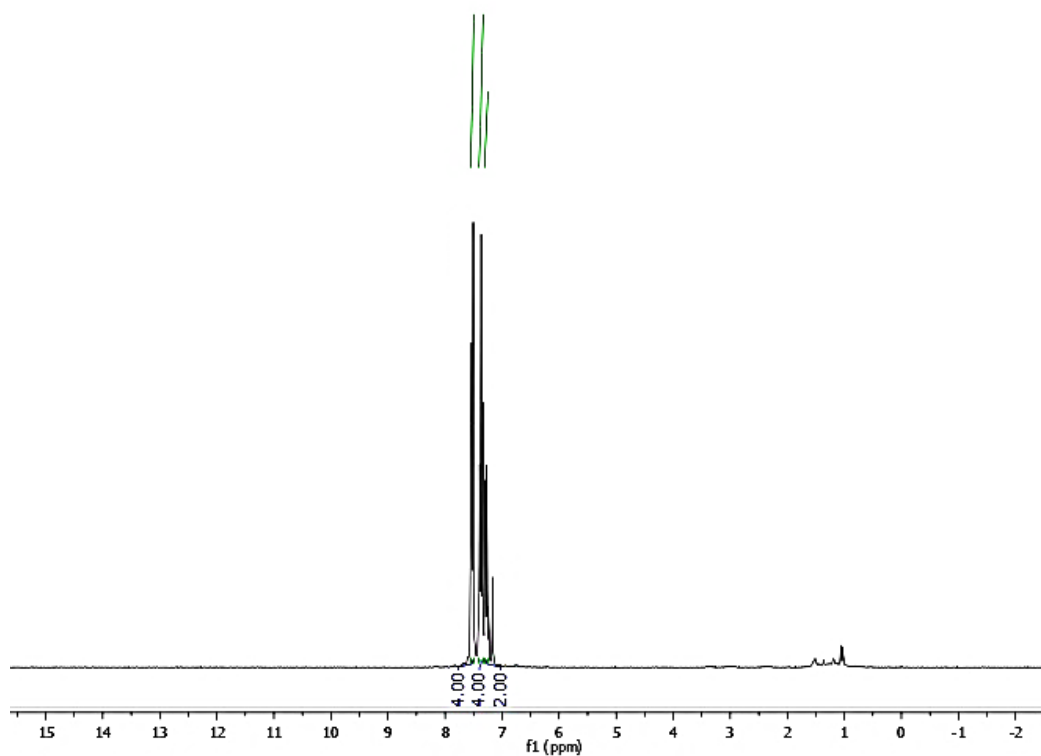

**Figure S10.** <sup>1</sup>H NMR spectrum of Biphenyl (CDCl<sub>3</sub>, 250 MHz)

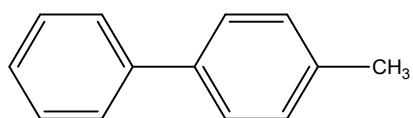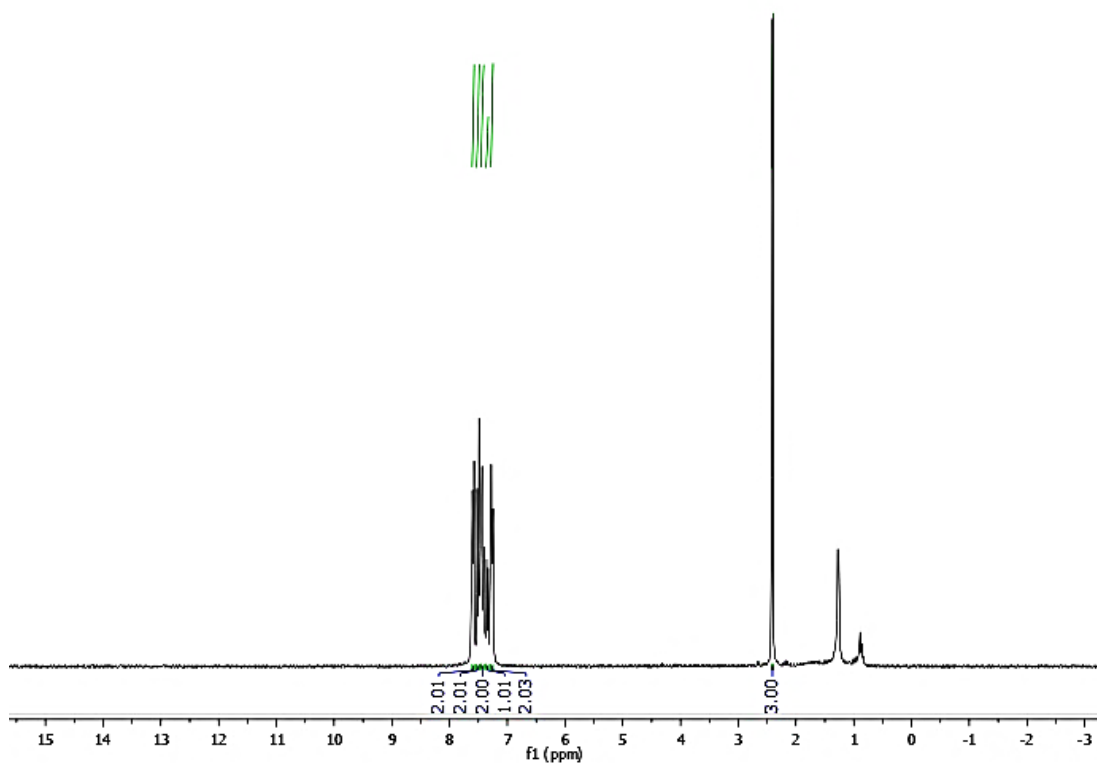

**Figure S11.** <sup>1</sup>H NMR spectrum of 4-Methylbiphenyl (CDCl<sub>3</sub>, 250 MHz)

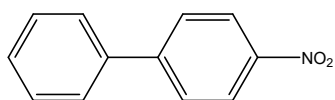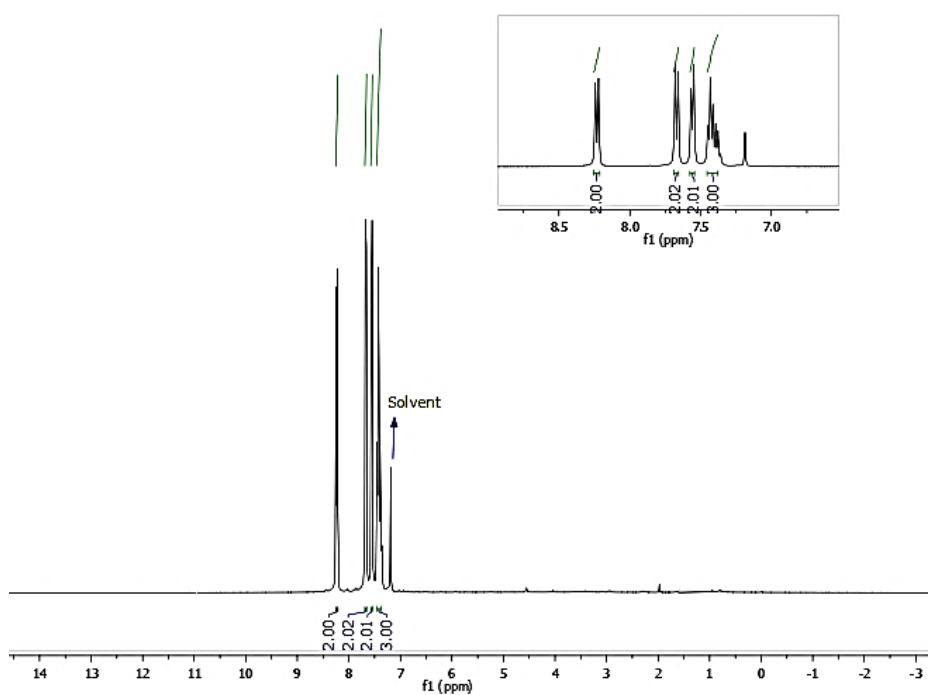

**Figure S12.**  $^1\text{H}$  NMR spectrum of 4-Nitrobiphenyl( $\text{CDCl}_3$ , 400 MHz)

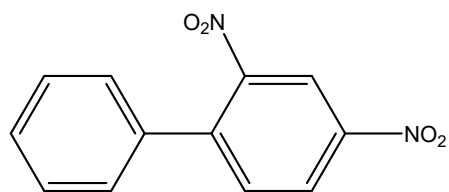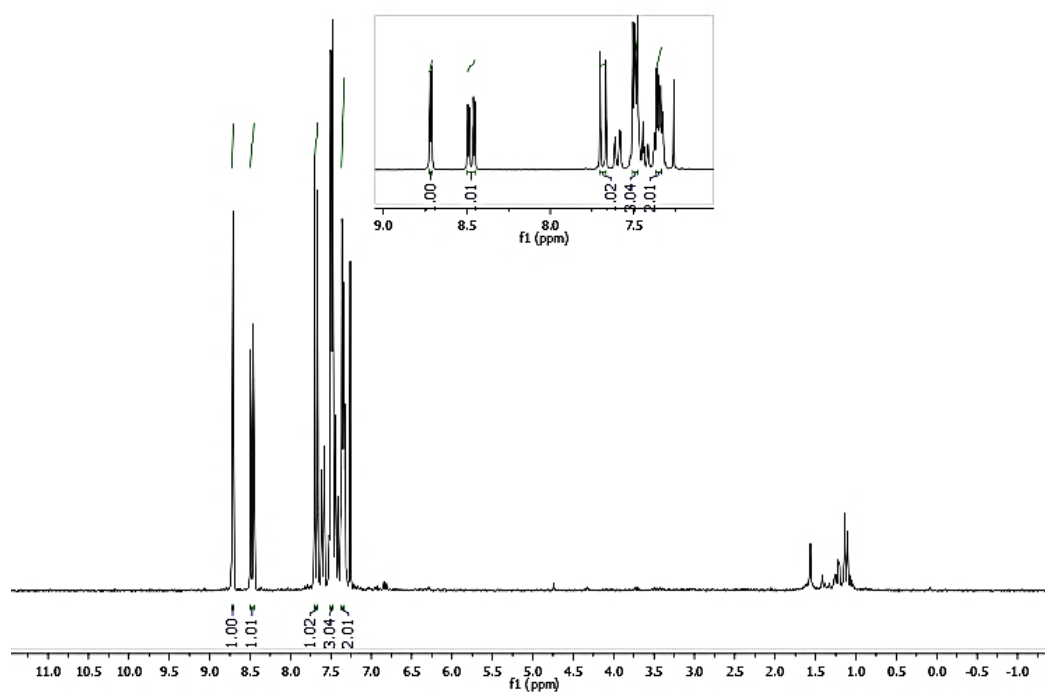

Figure S13.  $^1\text{H}$  NMR spectrum of 2,4-Dinitrophenyl( $\text{CDCl}_3$ , 250 MHz)

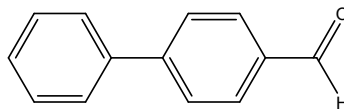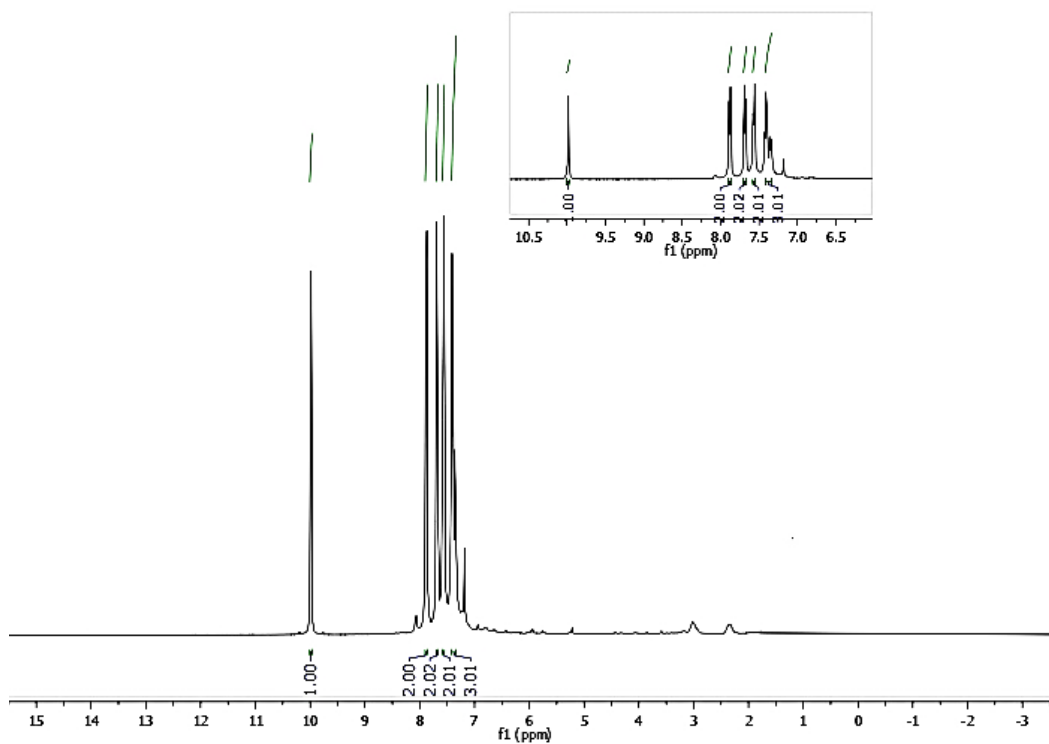

**Figure S14.** <sup>1</sup>H NMR spectrum of 4-Biphenylcarbaldehyd(CDCl<sub>3</sub>, 400 MHz)
